# Supplementary material
Source: HighWire-hosted journal article supplement (https://www.cmaj.ca/highwire/filestream/77360/field_highwire_adjunct_files/1/200143-ana-2-at.pdf)
Supplement: 200143-ana-2-at.pdf [file 200143-ana-2-at.pdf]

## Appendix 2 (as submitted by the authors): Capacity to Fund Healthcare from Public Cooffers: Canada’s “Vertical Imbalance” Over Time

| Date           | Source                                      | Context                                                                  | Key Findings                                                                                                                                                                  |
|----------------|---------------------------------------------|--------------------------------------------------------------------------|-------------------------------------------------------------------------------------------------------------------------------------------------------------------------------|
| November 1999  | Auditor General of Canada – Denis Desautels | Federal Support of Health Care Delivery                                  | Federal government should explore options to improve information on its total contribution to PTs for health care.                                                            |
| 2000           | Department of Finance Canada                | Refuting PT claims that the federal share of health funding was just 11% | Both the cash and health tax transfer of the CHST must be included. Including both brings the federal contribution to 30% nationally of PT health spending (34% in Ontario).  |
| August 2000    | Premiers                                    | Introduction of the concept of vertical imbalance.                       | Release of <i>Understanding Canada’s Health Care Costs</i> - estimates an \$8.8 billion gap between 2000-01 level of CHST and what it would have been had cuts not been made. |
| September 2000 | First Ministers                             | First Ministers Health Accord                                            | Additional \$18.9 billion in CHST funding over 5 years plus \$2.3 billion for medical equipment, health information technology and primary care.                              |
| August 2001    | Premiers                                    | Report on Fiscal Imbalance by Finance Ministers                          | Report charts decline of CHST cash from 18.1% of PT health, education and social services spending in 1994-95 to 12.6% in 2000-01. Presents 4 options for restoration.        |

Appendix to: Naylor CD, Boozary A, Adams O. Canadian federal-provincial/territorial funding of universal health care: fraught history, uncertain future. *CMAJ* 2020. doi: 10.1503/cmaj.200143.

Copyright © 2020 The Author(s) or their employer(s).

To receive this resource in an accessible format, please contact us at [cmajgroup@cmaj.ca](mailto:cmajgroup@cmaj.ca).

|                |                                           |                                                                     |                                                                                                                                                                                                            |
|----------------|-------------------------------------------|---------------------------------------------------------------------|------------------------------------------------------------------------------------------------------------------------------------------------------------------------------------------------------------|
| August 2002    | Premiers                                  | Conference Board report on fiscal imbalance                         | Federal surplus projected to be \$85.5 billion by 2019-20 and net debt eliminated while PT governments would be in collective deficit of \$12.2 billion and have net debt of \$387 billion.                |
| September 2002 | Auditor General of Canada – Sheila Fraser | Status update on the 1999 audit re: federal support for health care | There is no agreed-upon estimate that captures the federal contribution to health care.                                                                                                                    |
| March 2004     | PT Finance Ministers                      | Updated Conference Board report on fiscal imbalance                 | Projected federal surplus of \$78 billion and net debt reduced to \$128.8 billion by 2019-20 compared to collective PT deficit of \$11 billion and net debt of \$431.7 billion.                            |
| July 2004      | Premiers                                  | Premiers' Action Plan for Better Health                             | Call on federal government to assume full financial responsibility for a drug plan for all Canadians and to increase the Canada Health Transfer to cover 25% of total PT health spending.                  |
| August 2004    | Department of Finance Canada              | Further update of Conference Board report on fiscal imbalance       | Under different assumptions about federal debt repayment and PT revenue growth over 2004-05 to 2014-15, federal surplus projected to be \$24.4 billion and collective PT deficit \$3.5 billion in 2014-15. |
| September 2004 | Department of Finance Canada              | Fact sheet on federal support for health care                       | Disputing PT claims that the federal share of PT health spending was 16% - says CHT cash+ tax points represents 33% of PT health spending – adding a share of equalization and federal direct health       |

|                |                                            |                                                  |                                                                                                                                                                                                                                                   |
|----------------|--------------------------------------------|--------------------------------------------------|---------------------------------------------------------------------------------------------------------------------------------------------------------------------------------------------------------------------------------------------------|
|                |                                            |                                                  | spending brings the federal share up to 40%.                                                                                                                                                                                                      |
| April 2006     | Council of the Federation                  | Report of the Advisory Panel on Fiscal Imbalance | 3 recommendations on vertical fiscal imbalance, including transparency in tax point adjustments. Increase in CHT/CST per capita cash, continuation of CHT 6% increase through 2013-14 and a growth rate of 4.5% for the CST over the same period. |
| February 2010  | Office of the Parliamentary Budget Officer | 1 <sup>st</sup> Fiscal Sustainability Report     | Projected fiscal gap estimate of 0.97% GDP over a 75 year horizon assuming a debt-to-GDP ratio of 33.9% - rising to 1.89% of GDP if 6% CHT escalator continued beyond 2013-14.                                                                    |
| September 2011 | Office of the Parliamentary Budget Officer | 2 <sup>nd</sup> Fiscal Sustainability Report     | Adds fiscal gap estimates for PT governments overall. Assuming target debt-to-GDP ratio of 36.6% federal and 20.3% PT, gap estimates were 1.2% of GDP federal and 1.5% of GDP for PT governments.                                                 |
| January 2012   | Office of the Parliamentary Budget Officer | Implications of the December, 2011 CHT changes   | As a result of changes announced by Flaherty, PT fiscal gap increased to 2.9% of GDP while federal gap reduced to -0.4% of GDP.                                                                                                                   |
| December 2016  | Ontario Minister of Finance                | Cost drivers of health spending                  | Call for a 5.2% CHT escalator based on Conference Board estimates of components of cost growth.                                                                                                                                                   |

|                |                                            |                                                          |                                                                                                                                                                                                                                                                                                                                                                     |
|----------------|--------------------------------------------|----------------------------------------------------------|---------------------------------------------------------------------------------------------------------------------------------------------------------------------------------------------------------------------------------------------------------------------------------------------------------------------------------------------------------------------|
| October 2017   | Office of the Parliamentary Budget Officer | Fiscal Sustainability Report 2017                        | First time presentation of fiscal gap estimates at individual PT level. Federal gap projected to be -1.2% of GDP, subnational gap estimate at 0.9% of GDP. Highest gaps were AB 4.6%, NL 6.5% and Territories 7.2% of GDP.                                                                                                                                          |
| September 2019 | Conference Board of Canada                 | Update on fiscal health of federal versus PT governments | Projections out to 2040-41. Federal government will be able to reduce net debt from current \$771 billion to \$679 billion by 2041. In a scenario where PT health costs grow by 4.9% annually PT net debt will reach \$2.3 trillion by 2040-41 and account for 54% of PT revenues. By 2040-41 CHT will represent 18.8% of PT health spending down from 22% in 2018. |
| September 2020 | Council of the Federation                  | Annual meeting communiqué                                | Call for immediate unconditional increase in the CHT to raise the federal share of PT health spending from 22% to 35% --would represent an increase of \$28 billion.                                                                                                                                                                                                |
|                |                                            |                                                          |                                                                                                                                                                                                                                                                                                                                                                     |
